# Supplementary material for: The Hsp90-Dependent Proteome Is Conserved and Enriched for Hub Proteins with High Levels of Protein–Protein Connectivity
Source: PubMed Central journal article supplement (PMC4224352; doi:10.1093/gbe/evu226), 2014-10-13

Figure S1

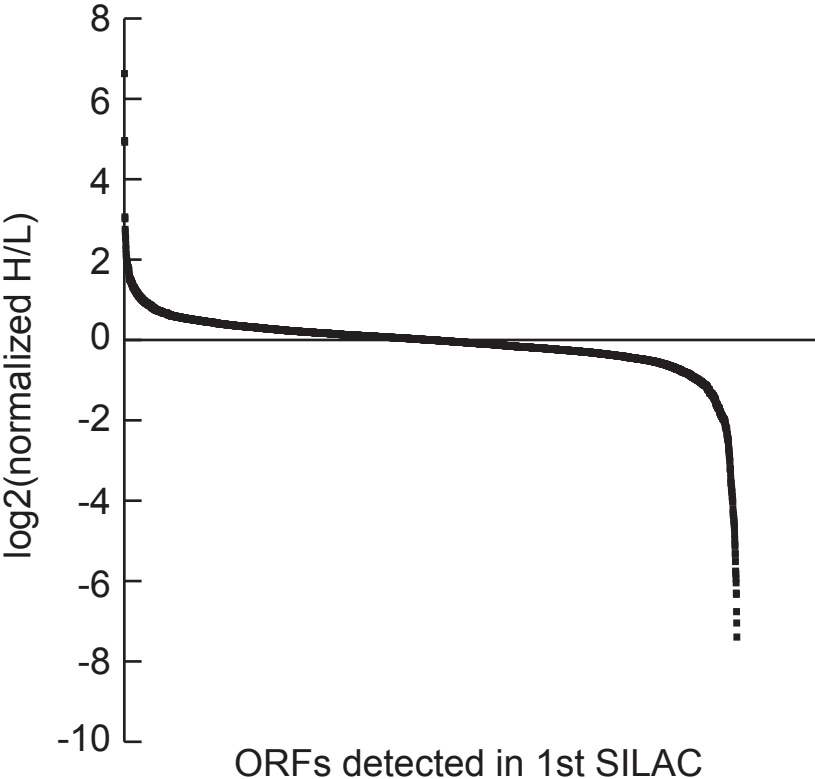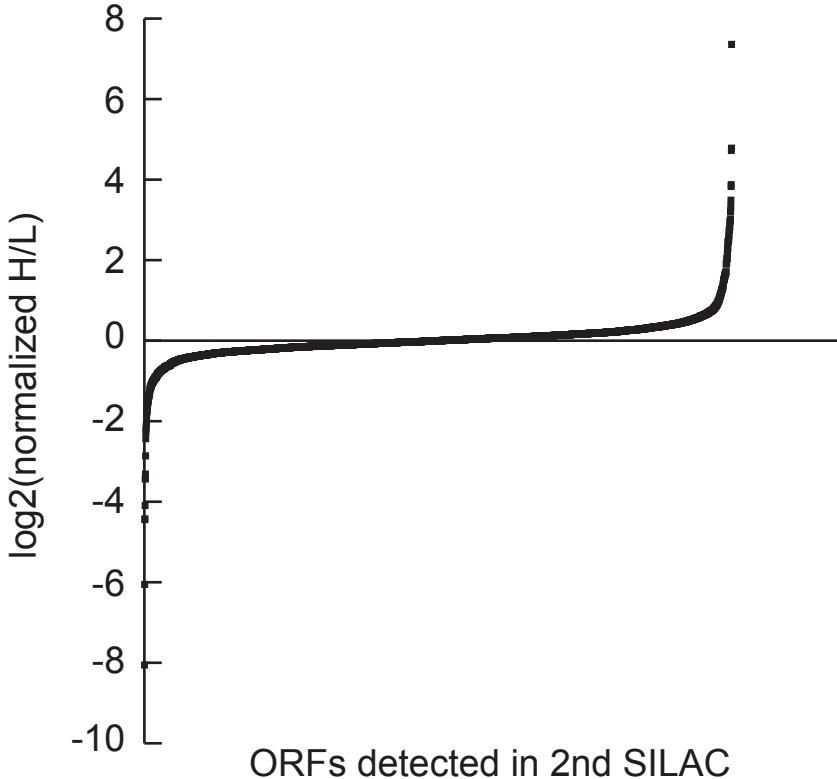

Figure S2

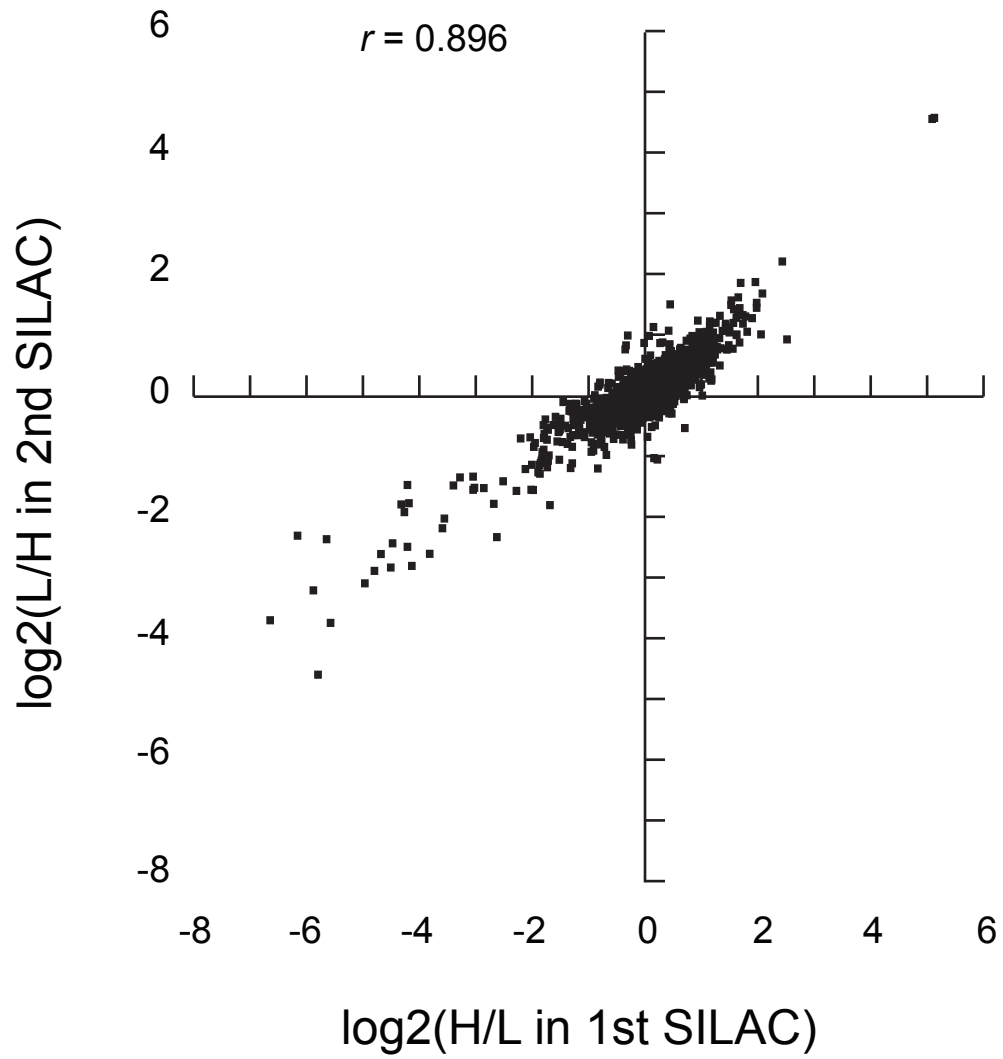



Figure S4

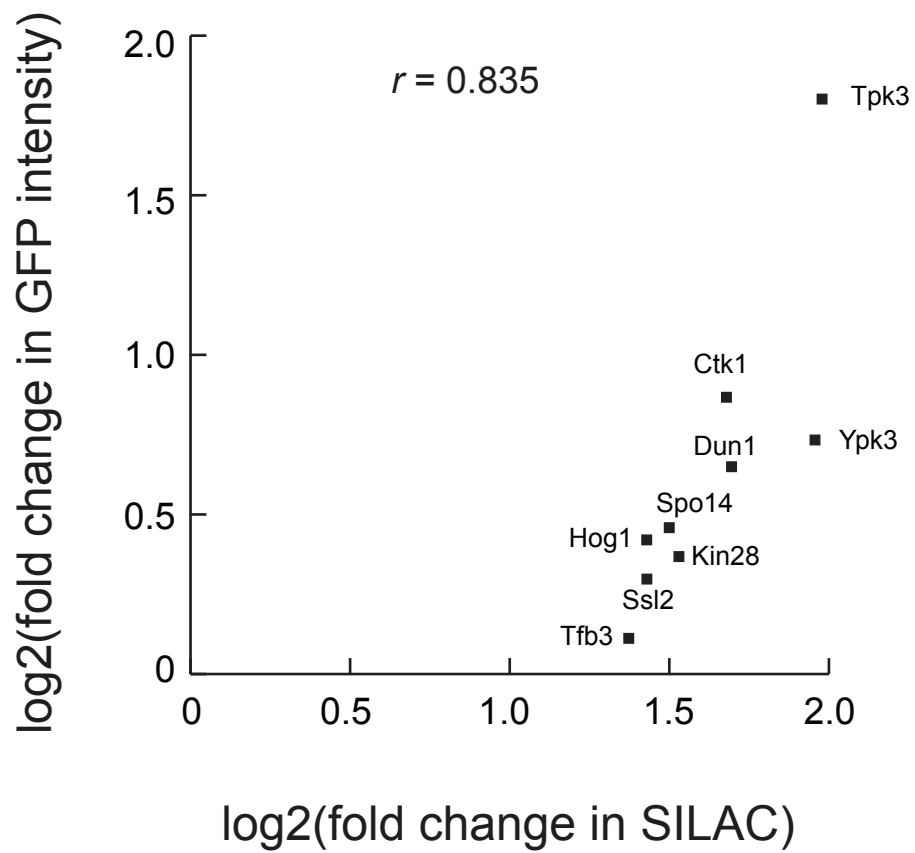

Figure S5

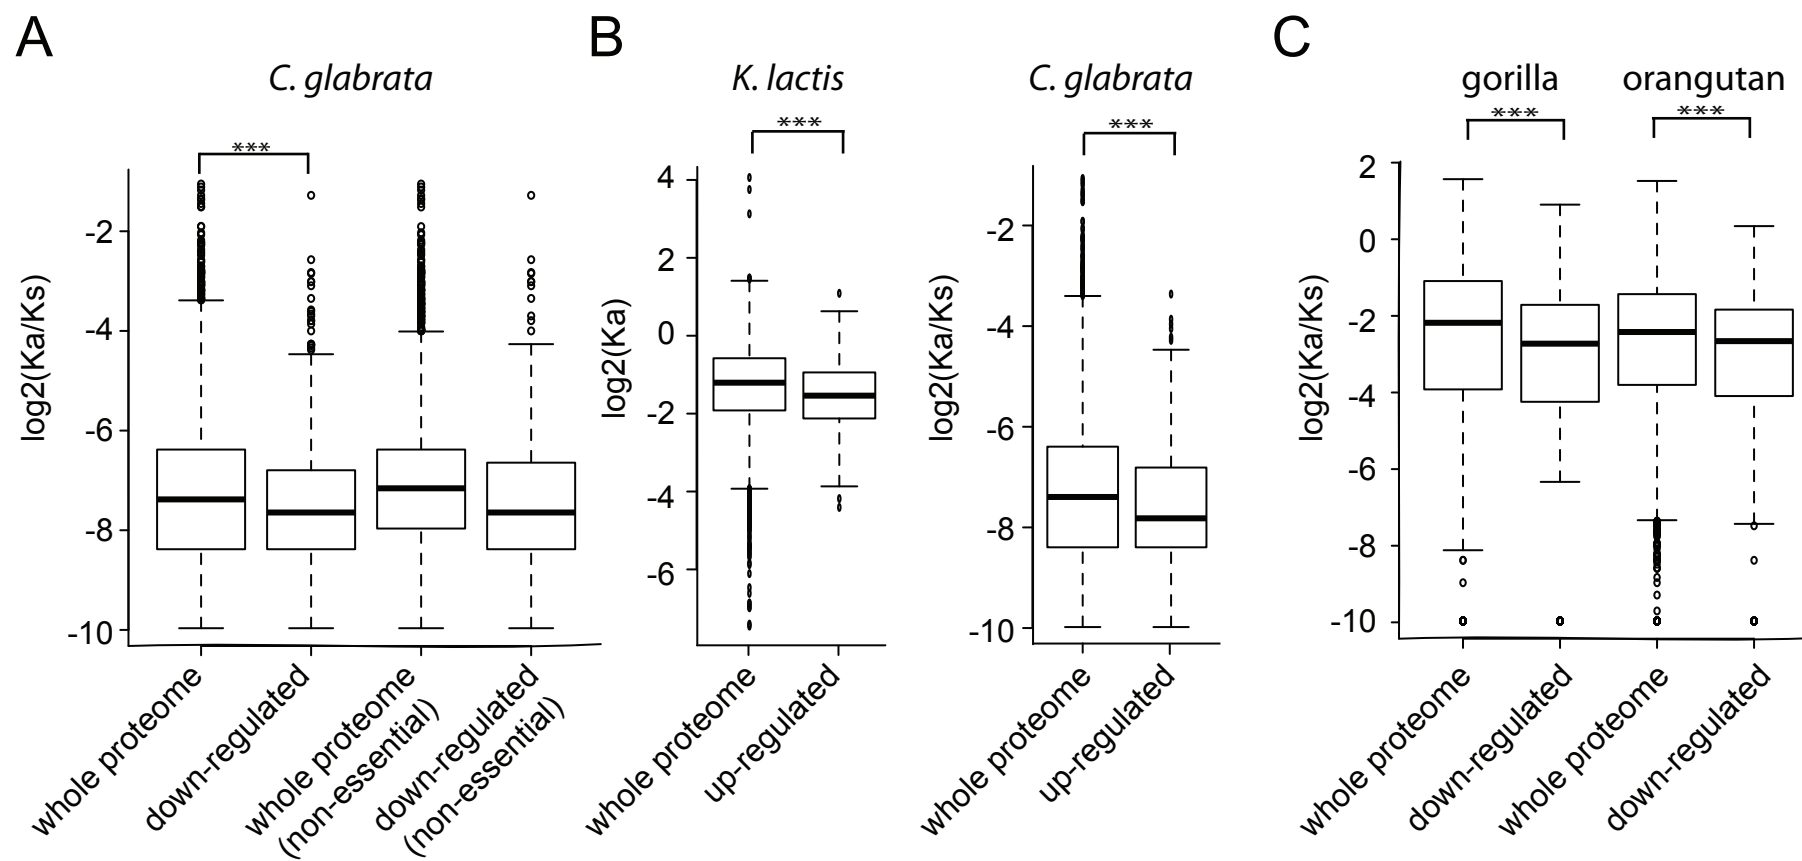

Supplement: supp_evu226_Supp_Fig.pdf [file supp_evu226_Supp_Fig.pdf]
